# Supplementary material
Source: MDPI journal article supplement (https://www.mdpi.com/2227-7102/12/12/937)
Supplement: s1 [file s1]

**File S1.** The Attitudes to Science and Religion (ASR) Instrument Short version) Developed by Tamjid Mujtaba & Michael Reiss, UCL.

**1. Are you a girl or a boy?**

**2. What is your first name?**

**3. What is your surname?**

**4. What is your date of birth?**

**5. What is the name of your school?**

**6. What year are you in?**

**7. What is your father's occupation?**

- ☐ Professional occupations (e.g. teachers, nurses, social worker, musician, police officer, software designer, welfare officer)
- ☐ Clerical and intermediate occupations (e.g. secretary, personal assistant, nursery nurse, office clerk)
- ☐ Senior managers/administrators (e.g. finance manager, chief executive)
- ☐ Technical and craft occupations (e.g. plumber, electrician, gardener, train driver, inspector)
- ☐ Semi-routine manual and service occupations (e.g. catering assistant, receptionist, sales assistant, receptionist)
- ☐ Routine manual and service occupations (e.g. cleaner, sewing machinist, labourer, waiter, bar staff, van driver)
- ☐ Middle or junior managers (e.g. office manager, bank manager, restaurant manager, retail manager)
- ☐ Traditional professional occupations (e.g. solicitor, scientist, civil, accountant, medical practitioner, mechanical engineer)
- ☐ House husband
- ☐ Unemployed and on benefits

**8. What is your mother's occupation?**

- ☐ Professional occupations (e.g. teachers, nurses, social worker, musician, police officer, software designer, welfare officer)
- ☐ Clerical and intermediate occupations (e.g. secretary, personal assistant, nursery nurse, office clerk)
- ☐ Senior managers/administrators (e.g. finance manager, chief executive)
- ☐ Technical and craft occupations (e.g. plumber, electrician, gardener, train driver, inspector)
- ☐ Semi-routine manual and service occupations (e.g. catering assistant, receptionist, sales assistant, receptionist)
- ☐ Routine manual and service occupations (e.g. cleaner, sewing machinist, labourer, waiter, bar staff, van driver)
- ☐ Middle or junior managers (e.g. office manager, bank manager, restaurant manager, retail manager)
- ☐ Traditional professional occupations (e.g. solicitor, scientist, civil, accountant, medical practitioner, mechanical engineer)
- ☐ House wife
- ☐ Unemployed and on benefits

**9. What is your religion?**

**10. What is your ethnicity?**

**11. Please indicate how much do you agree with the following statements about your views about religion.**

|                                                                       | Strongly<br>Disagree     | Disagree                 | Slightly<br>Disagree     | Slightly<br>agree        | Agree                    | Strongly<br>Agree        |
|-----------------------------------------------------------------------|--------------------------|--------------------------|--------------------------|--------------------------|--------------------------|--------------------------|
| 11.1. I believe science and religion are not at odds with each other. | <input type="checkbox"/> |
| 11.2. There is no place for science in my life.                       | <input type="checkbox"/> |
| 11.3. There is no place for religion in my life.                      | <input type="checkbox"/> |
| 11.4. I have a strong religious faith.                                | <input type="checkbox"/> |
| 11.5. My family has a strong religious faith.                         | <input type="checkbox"/> |

|                                                                                     | Strongly<br>Disagree     | Disagree                 | Slightly<br>Disagree     | Slightly<br>agree        | Agree                    | Strongly<br>Agree        |
|-------------------------------------------------------------------------------------|--------------------------|--------------------------|--------------------------|--------------------------|--------------------------|--------------------------|
| 11.6. My family believes that science and religion are not at odds with each other. | <input type="checkbox"/> |

**12. Please indicate how much you agree with the following statements.**

|                                                               | Strongly<br>Disagree     | Disagree                 | Slightly<br>Disagree     | Slightly<br>agree        | Agree                    | Strongly<br>Agree        |
|---------------------------------------------------------------|--------------------------|--------------------------|--------------------------|--------------------------|--------------------------|--------------------------|
| 12.1. I intend to study science after the age of sixteen.     | <input type="checkbox"/> |
| 12.2. I generally have fun when I am learning science topics. | <input type="checkbox"/> |
| 12.3. I like reading about science.                           | <input type="checkbox"/> |
| 12.4. I enjoy getting new knowledge in science.               | <input type="checkbox"/> |
| 12.5. I am interested in learning about science.              | <input type="checkbox"/> |
| 12.6. I see myself as open to new experiences.                | <input type="checkbox"/> |

**13. Please indicate how much you agree with the following statements.**

|                                                                                    | Strongly<br>Disagree     | Disagree                 | Slightly<br>Disagree     | Slightly<br>agree        | Agree                    | Strongly<br>Agree        |
|------------------------------------------------------------------------------------|--------------------------|--------------------------|--------------------------|--------------------------|--------------------------|--------------------------|
| 13.1. I like doing better than others in tests.                                    | <input type="checkbox"/> |
| 13.2. I get satisfaction in taking part in competitions and challenges.            | <input type="checkbox"/> |
| 13.3. I often try to outperform others in tests, competitions or tasks.            | <input type="checkbox"/> |
| 13.4. I want to be the best in school.                                             | <input type="checkbox"/> |
| 13.5. Getting high marks in school is very important to me.                        | <input type="checkbox"/> |
| 13.6. It is important for me to get information to support my opinions.            | <input type="checkbox"/> |
| 13.7. I usually have more than one source of information before making a decision. | <input type="checkbox"/> |
| 13.8. I back my decisions by the information I have.                               | <input type="checkbox"/> |

|                                                                                 | Strongly<br>Disagree     | Disagree                 | Slightly<br>Disagree     | Slightly<br>agree        | Agree                    | Strongly<br>Agree        |
|---------------------------------------------------------------------------------|--------------------------|--------------------------|--------------------------|--------------------------|--------------------------|--------------------------|
| 13.9. I listen to the ideas of others even if I disagree with them.             | <input type="checkbox"/> |
| 13.10. I keep my mind open to different ideas when planning to make a decision. | <input type="checkbox"/> |

**14. These statements are to do with how you make up your mind about topics at school or about issues in general that require a decision. Please indicate how much you agree with the following statements.**

|                                                                                    | Strongly<br>Disagree     | Disagree                 | Slightly<br>Disagree     | Slightly<br>agree        | Agree                    | Strongly<br>Agree        |
|------------------------------------------------------------------------------------|--------------------------|--------------------------|--------------------------|--------------------------|--------------------------|--------------------------|
| 14.1. It is important for me to get information to support my opinions.            | <input type="checkbox"/> |
| 14.2. I usually have more than one source of information before making a decision. | <input type="checkbox"/> |
| 14.3. I back my decisions by the information I have.                               | <input type="checkbox"/> |
| 14.4. I listen to the ideas of others even if I disagree with them.                | <input type="checkbox"/> |
| 14.5. I keep my mind open to different ideas when planning to make a decision.     | <input type="checkbox"/> |

**15. These statements are to do with the role of religion in your life. Please indicate how much you agree with the following statements.**

|                                                                                                                 | Strongly<br>Disagree     | Disagree                 | Slightly<br>Disagree     | Slightly<br>agree        | Agree                    | Strongly<br>Agree        |
|-----------------------------------------------------------------------------------------------------------------|--------------------------|--------------------------|--------------------------|--------------------------|--------------------------|--------------------------|
| 15.1. I regularly think about religious issues.                                                                 | <input type="checkbox"/> |
| 15.1. I believe that God or something divine exists.                                                            | <input type="checkbox"/> |
| 15.2. I regularly take part in religious services.                                                              | <input type="checkbox"/> |
| 15.3. I often pray.                                                                                             | <input type="checkbox"/> |
| 15.4. I usually experience situations in which I have the feeling that God or something divine acts in my life. | <input type="checkbox"/> |

|                                                                                                                                                 | Strongly<br>Disagree     | Disagree                 | Slightly<br>Disagree     | Slightly<br>agree        | Agree                    | Strongly<br>Agree        |
|-------------------------------------------------------------------------------------------------------------------------------------------------|--------------------------|--------------------------|--------------------------|--------------------------|--------------------------|--------------------------|
| 15.5. I am interested in learning more about religious topics.                                                                                  | <input type="checkbox"/> |
| 15.6. I believe in an afterlife – e.g. immortality of the soul, resurrection of the dead or reincarnation.                                      | <input type="checkbox"/> |
| 15.7. It is important for me to take part in religious services.                                                                                | <input type="checkbox"/> |
| 15.8. Personal prayer is very important for me.                                                                                                 | <input type="checkbox"/> |
| 15.9. I often experience situations in which I have the feeling that God or something divine wants to communicate or to reveal something to me. | <input type="checkbox"/> |
| 15.10. I find it hard to believe in God.                                                                                                        | <input type="checkbox"/> |

**16. Please indicate how much you agree with the following statements about religion.**

|                                                       | Strongly<br>Disagree     | Disagree                 | Slightly<br>Disagree     | Slightly<br>agree        | Agree                    | Strongly<br>Agree        |
|-------------------------------------------------------|--------------------------|--------------------------|--------------------------|--------------------------|--------------------------|--------------------------|
| 16.1. I find it hard to believe in God.               | <input type="checkbox"/> |
| 16.2. Prayer helps me a lot.                          | <input type="checkbox"/> |
| 16.3. I think going to worship is a waste of my time. | <input type="checkbox"/> |
| 16.4. I know that God is very close to me.            | <input type="checkbox"/> |
| 16.5. God helps me to lead a better life.             | <input type="checkbox"/> |
| 16.6. I know that God helps me.                       | <input type="checkbox"/> |
| 16.7. God means a lot to me.                          | <input type="checkbox"/> |

**17. Please indicate how much you agree with the following statements about science and religion.**

|                                                                                                   | Strongly<br>Disagree     | Disagree                 | Slightly<br>Disagree     | Slightly<br>agree        | Agree                    | Strongly<br>Agree        |
|---------------------------------------------------------------------------------------------------|--------------------------|--------------------------|--------------------------|--------------------------|--------------------------|--------------------------|
| 17.1. The animals and plants we know today have evolved from earlier kinds of animals and plants. | <input type="checkbox"/> |

|                                                                                                             | Strongly<br>Disagree     | Disagree                 | Slightly<br>Disagree     | Slightly<br>agree        | Agree                    | Strongly<br>Agree        |
|-------------------------------------------------------------------------------------------------------------|--------------------------|--------------------------|--------------------------|--------------------------|--------------------------|--------------------------|
| 17.2. God created all the species of animals and plants directly.                                           | <input type="checkbox"/> |
| 17.3. I accept the idea of evolution giving rise to new kinds of animals and plants over millions of years. | <input type="checkbox"/> |
| 17.4. I believe that God made the world in six days of 24 hours.                                            | <input type="checkbox"/> |
| 17.5. God made woman out of man's rib.                                                                      | <input type="checkbox"/> |

**18. Write a few lines to explain what you understand by the word 'religion'.**

**19. Please indicate how much you agree with the following statements about how well science can explain parts of our world.**

|                                                                                                   | Strongly<br>Disagree     | Disagree                 | Slightly<br>Disagree     | Slightly<br>agree        | Agree                    | Strongly<br>Agree        |
|---------------------------------------------------------------------------------------------------|--------------------------|--------------------------|--------------------------|--------------------------|--------------------------|--------------------------|
| 19.1. Biology doesn't explain everything about life.                                              | <input type="checkbox"/> |
| 19.2. Everything people do is decided by their brains.                                            | <input type="checkbox"/> |
| 19.3. The physical brain and human experience are two sides of the same coin.                     | <input type="checkbox"/> |
| 19.4. The human mind is really just a computer program.                                           | <input type="checkbox"/> |
| 19.5. The intelligence of humans is like that of computers in some ways, but different in others. | <input type="checkbox"/> |
| 19.6. The more science advances the more it shows how mysterious the world is.                    | <input type="checkbox"/> |
| 19.7. Science can potentially explain everything.                                                 | <input type="checkbox"/> |

**20. Write a few lines to explain what you understand by the word 'science'.**

**21. Please indicate how much you agree with the following statements about scientific theories.**

|                                                                                                                                                                | Strongly<br>Disagree     | Disagree                 | Slightly<br>Disagree     | Slightly<br>agree        | Agree                    | Strongly<br>Agree        |
|----------------------------------------------------------------------------------------------------------------------------------------------------------------|--------------------------|--------------------------|--------------------------|--------------------------|--------------------------|--------------------------|
| 21.1. Science explains things in one way; religion explains them in another.                                                                                   | <input type="checkbox"/> |
| 21.2. It is science alone, not God, that explains the origin of the world.                                                                                     | <input type="checkbox"/> |
| 21.3. Religion and science both explain the origin of the world in different ways.                                                                             | <input type="checkbox"/> |
| 21.4. The laws of nature leave no room for God to act in the world.                                                                                            | <input type="checkbox"/> |
| 21.5. God doesn't influence the world in the same way as the laws of nature.                                                                                   | <input type="checkbox"/> |
| 21.6. Evolution leaves no room for God to influence how life develops.                                                                                         | <input type="checkbox"/> |
| 21.7. Evolution is God's way of bringing species into existence.                                                                                               | <input type="checkbox"/> |
| 21.8. It is possible to believe in a God and still hold the view that life on earth, including human life, evolved over time as a result of natural selection. | <input type="checkbox"/> |
| 21.9. People who accept evolution do not believe in God.                                                                                                       | <input type="checkbox"/> |
| 21.10. The Big Bang was not responsible for the start of the universe; it was created by God.                                                                  | <input type="checkbox"/> |

**22. These questions ask about your ideas about scientific theories. Creationism is the belief that the universe and living organisms originate from specific acts of divine creation rather than by natural processes such as evolution.**

|                                                                                                              | Strongly<br>Disagree     | Disagree                 | Slightly<br>Disagree     | Slightly<br>agree        | Agree                    | Strongly<br>Agree        |
|--------------------------------------------------------------------------------------------------------------|--------------------------|--------------------------|--------------------------|--------------------------|--------------------------|--------------------------|
| 22.1 Would you support creationism being taught alongside evolution in the science classroom?                | <input type="checkbox"/> |
| 22.2 Would you support creationism being taught alongside evolution in the RE classroom?                     | <input type="checkbox"/> |
| 22.3 Do you consider biological evolution as being in conflict with your personal religious beliefs?         | <input type="checkbox"/> |
| 22.4 Would you like science lessons to include religious views, for example about how the world was created? | <input type="checkbox"/> |

**23. What do you think a theory is?**

**24. What do you think a law of nature is?**

**25. What do you think the term miracle means?**

**26. When you think about what religious texts say, do you find that they seem to contradict what you hear in science (contradict means something which does not support an idea)? Explain how/Why not.**

**27. Write a few lines to describe how you see the relationship between science and religion. Are they distinct or do they tackle overlapping questions? Are science and religion complementary or in conflict?**

**28. Add any comments here**

**File S2. The Attitudes to Science and Religion (ASR) Instrument**  
Developed by Tamjid Mujtaba & Michael Reiss

**1. Are you a girl or a boy?**

**2. What is your first name?**

**3. What is your surname?**

**4. What is your date of birth?**



**5. What is the name of your school?**

**6. What year are you in?**

**7. What is your father's occupation?**

- ☐ Professional occupations (e.g. teachers, nurses, social worker, musician, police officer, software designer, welfare officer)
- ☐ Clerical and intermediate occupations (e.g. secretary, personal assistant, nursery nurse, office clerk)
- ☐ Senior managers/administrators (e.g. finance manager, chief executive)
- ☐ Technical and craft occupations (e.g. plumber, electrician, gardener, train driver, inspector)
- ☐ Semi-routine manual and service occupations (e.g. catering assistant, receptionist, sales assistant, receptionist)
- ☐ Routine manual and service occupations (e.g. cleaner, sewing machinist, labourer, waiter, bar staff, van driver)
- ☐ Middle or junior managers (e.g. office manager, bank manager, restaurant manager, retail manager)
- ☐ Traditional professional occupations (e.g. solicitor, scientist, civil, accountant, medical practitioner, mechanical engineer)
- ☐ House husband
- ☐ Unemployed and on benefits

**8. What is your mother's occupation?**

- ☐ Professional occupations (e.g. teachers, nurses, social worker, musician, police officer, software designer, welfare officer)
- ☐ Clerical and intermediate occupations (e.g. secretary, personal assistant, nursery nurse, office clerk)
- ☐ Senior managers/administrators (e.g. finance manager, chief executive)
- ☐ Technical and craft occupations (e.g. plumber, electrician, gardener, train driver, inspector)
- ☐ Semi-routine manual and service occupations (e.g. catering assistant, receptionist, sales assistant, receptionist)
- ☐ Routine manual and service occupations (e.g. cleaner, sewing machinist, labourer, waiter, bar staff, van driver)
- ☐ Middle or junior managers (e.g. office manager, bank manager, restaurant manager, retail manager)
- ☐ Traditional professional occupations (e.g. solicitor, scientist, civil, accountant, medical practitioner, mechanical engineer)
- ☐ House wife
- ☐ Unemployed and on benefits

**9. What is your religion?**

|  |
|--|
|  |
|--|

**10. What is your ethnicity?**

|  |
|--|
|  |
|--|

**11. Please indicate how much do you agree with the following statements about your views about religion.**

|                                                                                     | Strongly<br>Disagree     | Disagree                 | Slightly<br>Disagree     | Slightly<br>agree        | Agree                    | Strongly<br>Agree        |
|-------------------------------------------------------------------------------------|--------------------------|--------------------------|--------------------------|--------------------------|--------------------------|--------------------------|
| 11.1. I believe science and religion are not at odds with each other.               | <input type="checkbox"/> |
| 11.2. There is no place for science in my life.                                     | <input type="checkbox"/> |
| 11.3. There is no place for religion in my life.                                    | <input type="checkbox"/> |
| 11.4. I have a strong religious faith.                                              | <input type="checkbox"/> |
| 11.5. My family has a strong religious faith.                                       | <input type="checkbox"/> |
| 11.6. My family believes that science and religion are not at odds with each other. | <input type="checkbox"/> |

**12. Please indicate how much you agree with the following statements.**

|                                                               | Strongly<br>Disagree     | Disagree                 | Slightly<br>Disagree     | Slightly<br>agree        | Agree                    | Strongly<br>Agree        |
|---------------------------------------------------------------|--------------------------|--------------------------|--------------------------|--------------------------|--------------------------|--------------------------|
| 12.1. I intend to study science after the age of sixteen.     | <input type="checkbox"/> |
| 12.2. I generally have fun when I am learning science topics. | <input type="checkbox"/> |
| 12.3. I like reading about science.                           | <input type="checkbox"/> |
| 12.4. I enjoy getting new knowledge in science.               | <input type="checkbox"/> |
| 12.5. I am interested in learning about science.              | <input type="checkbox"/> |
| 12.6. I see myself as open to new experiences.                | <input type="checkbox"/> |

**13. Please indicate how much you agree with the following statements.**

|                                                                                    | Strongly<br>Disagree     | Disagree                 | Slightly<br>Disagree     | Slightly<br>agree        | Agree                    | Strongly<br>Agree        |
|------------------------------------------------------------------------------------|--------------------------|--------------------------|--------------------------|--------------------------|--------------------------|--------------------------|
| 13.1. I like doing better than others in tests.                                    | <input type="checkbox"/> |
| 13.2. I get satisfaction in taking part in competitions and challenges.            | <input type="checkbox"/> |
| 13.3. I often try to outperform others in tests, competitions or tasks.            | <input type="checkbox"/> |
| 13.4. I want to be the best in school.                                             | <input type="checkbox"/> |
| 13.5. Getting high marks in school is very important to me.                        | <input type="checkbox"/> |
| 13.6. It is important for me to get information to support my opinions.            | <input type="checkbox"/> |
| 13.7. I usually have more than one source of information before making a decision. | <input type="checkbox"/> |
| 13.8. I back my decisions by the information I have.                               | <input type="checkbox"/> |
| 13.9. I listen to the ideas of others even if I disagree with them.                | <input type="checkbox"/> |
| 13.10. I keep my mind open to different ideas when planning to make a decision.    | <input type="checkbox"/> |

**14. These statements are to do with how you make up your mind about topics at school or about issues in general that require a decision. Please indicate how much you agree with the following statements.**

|                                                                                    | Strongly<br>Disagree     | Disagree                 | Slightly<br>Disagree     | Slightly<br>agree        | Agree                    | Strongly<br>Agree        |
|------------------------------------------------------------------------------------|--------------------------|--------------------------|--------------------------|--------------------------|--------------------------|--------------------------|
| 14.1. It is important for me to get information to support my opinions.            | <input type="checkbox"/> |
| 14.2. I usually have more than one source of information before making a decision. | <input type="checkbox"/> |
| 14.3. I back my decisions by the information I have.                               | <input type="checkbox"/> |
| 14.4. I listen to the ideas of others even if I disagree with them.                | <input type="checkbox"/> |
| 14.5. I keep my mind open to different ideas when planning to make a decision.     | <input type="checkbox"/> |

**15. These statements are to do with the role of religion in your life. Please indicate how much you agree with the following statements.**

|                                                                                                                                                 | Strongly<br>Disagree     | Disagree                 | Slightly<br>Disagree     | Slightly<br>agree        | Agree                    | Strongly<br>Agree        |
|-------------------------------------------------------------------------------------------------------------------------------------------------|--------------------------|--------------------------|--------------------------|--------------------------|--------------------------|--------------------------|
| 15.1. I regularly think about religious issues.                                                                                                 | <input type="checkbox"/> |
| 15.1. I believe that God or something divine exists.                                                                                            | <input type="checkbox"/> |
| 15.2. I regularly take part in religious services.                                                                                              | <input type="checkbox"/> |
| 15.3. I often pray.                                                                                                                             | <input type="checkbox"/> |
| 15.4. I usually experience situations in which I have the feeling that God or something divine acts in my life.                                 | <input type="checkbox"/> |
| 15.5. I am interested in learning more about religious topics.                                                                                  | <input type="checkbox"/> |
| 15.6. I believe in an afterlife – e.g. immortality of the soul, resurrection of the dead or reincarnation.                                      | <input type="checkbox"/> |
| 15.7. It is important for me to take part in religious services.                                                                                | <input type="checkbox"/> |
| 15.8. Personal prayer is very important for me.                                                                                                 | <input type="checkbox"/> |
| 15.9. I often experience situations in which I have the feeling that God or something divine wants to communicate or to reveal something to me. | <input type="checkbox"/> |
| 15.10. I find it hard to believe in God.                                                                                                        | <input type="checkbox"/> |

**16. Please indicate how much you agree with the following statements about religion.**

|                                                       | Strongly<br>Disagree     | Disagree                 | Slightly<br>Disagree     | Slightly<br>agree        | Agree                    | Strongly<br>Agree        |
|-------------------------------------------------------|--------------------------|--------------------------|--------------------------|--------------------------|--------------------------|--------------------------|
| 16.1. I find it hard to believe in God.               | <input type="checkbox"/> |
| 16.2. Prayer helps me a lot.                          | <input type="checkbox"/> |
| 16.3. I think going to worship is a waste of my time. | <input type="checkbox"/> |
| 16.4. I know that God is very close to me.            | <input type="checkbox"/> |
| 16.5. God helps me to lead a better life.             | <input type="checkbox"/> |

|                                 | Strongly<br>Disagree     | Disagree                 | Slightly<br>Disagree     | Slightly<br>agree        | Agree                    | Strongly<br>Agree        |
|---------------------------------|--------------------------|--------------------------|--------------------------|--------------------------|--------------------------|--------------------------|
| 16.6. I know that God helps me. | <input type="checkbox"/> |
| 16.7. God means a lot to me.    | <input type="checkbox"/> |

**17. Please indicate how much you agree with the following statements about science and religion.**

|                                                                                                             | Strongly<br>Disagree     | Disagree                 | Slightly<br>Disagree     | Slightly<br>agree        | Agree                    | Strongly<br>Agree        |
|-------------------------------------------------------------------------------------------------------------|--------------------------|--------------------------|--------------------------|--------------------------|--------------------------|--------------------------|
| 17.1. The animals and plants we know today have evolved from earlier kinds of animals and plants.           | <input type="checkbox"/> |
| 17.2. God created all the species of animals and plants directly.                                           | <input type="checkbox"/> |
| 17.3. I accept the idea of evolution giving rise to new kinds of animals and plants over millions of years. | <input type="checkbox"/> |
| 17.4. I believe that God made the world in six days of 24 hours.                                            | <input type="checkbox"/> |
| 17.5. God made woman out of man's rib.                                                                      | <input type="checkbox"/> |

**18. Write a few lines to explain what you understand by the word 'religion'.**

**19. Please indicate how much do you agree with the following statements about science and scientists.**

|                                                                                                  | Strongly<br>Disagree     | Disagree                 | Slightly<br>Disagree     | Slightly<br>agree        | Agree                    | Strongly<br>Agree        |
|--------------------------------------------------------------------------------------------------|--------------------------|--------------------------|--------------------------|--------------------------|--------------------------|--------------------------|
| 19.1. Scientists ignore evidence that contradicts their work.                                    | <input type="checkbox"/> |
| 19.2. Scientific theories are weak explanations.                                                 | <input type="checkbox"/> |
| 19.3. We can trust scientists to share their discoveries even if they don't like their findings. | <input type="checkbox"/> |
| 19.4. Scientists don't value the ideas of others.                                                | <input type="checkbox"/> |
| 19.5. I trust that the work of scientists to make life better for people.                        | <input type="checkbox"/> |

|                                                                                 | Strongly<br>Disagree     | Disagree                 | Slightly<br>Disagree     | Slightly<br>agree        | Agree                    | Strongly<br>Agree        |
|---------------------------------------------------------------------------------|--------------------------|--------------------------|--------------------------|--------------------------|--------------------------|--------------------------|
| 19.6. Scientific theories are trustworthy.                                      | <input type="checkbox"/> |
| 19.7. We cannot trust scientists because they are biased in their perspectives. | <input type="checkbox"/> |
| 19.8. We can trust scientists to evaluate the work of other scientists.         | <input type="checkbox"/> |

**20. Please indicate how much you agree with the following statements about science.**

|                                                                           | Strongly<br>Disagree     | Disagree                 | Slightly<br>Disagree     | Slightly<br>agree        | Agree                    | Strongly<br>Agree        |
|---------------------------------------------------------------------------|--------------------------|--------------------------|--------------------------|--------------------------|--------------------------|--------------------------|
| 20.1. More scientists are urgently needed.                                | <input type="checkbox"/> |
| 20.2. Scientific discoveries do more harm than good.                      | <input type="checkbox"/> |
| 20.3. Science is very important for a country's development               | <input type="checkbox"/> |
| 20.4. Money spent on science is well worth spending.                      | <input type="checkbox"/> |
| 20.5. Science will help to make the world a better place in the future.   | <input type="checkbox"/> |
| 20.6. Science is relevant to everyday life.                               | <input type="checkbox"/> |
| 20.7. Science can give us absolute truths.                                | <input type="checkbox"/> |
| 20.8. Science alone can provide truths about nature.                      | <input type="checkbox"/> |
| 20.9. Science will eventually give us complete control over the world.    | <input type="checkbox"/> |
| 20.10. Theories in science can be proved to be definitely true.           | <input type="checkbox"/> |
| 20.11. The laws of science will never be changed.                         | <input type="checkbox"/> |
| 20.12. Theories in science are never proved with absolute certainty.      | <input type="checkbox"/> |
| 20.13. Nothing should be believed unless it can be proved scientifically. | <input type="checkbox"/> |

**21. These statements are about how important science is to you. Please indicate how much you agree with them.**

|                                                                                                                         | Strongly<br>Disagree     | Disagree                 | Slightly<br>Disagree     | Slightly<br>agree        | Agree                    | Strongly<br>Agree        |
|-------------------------------------------------------------------------------------------------------------------------|--------------------------|--------------------------|--------------------------|--------------------------|--------------------------|--------------------------|
| 21.1. I often think about scientific issues, e.g. the diversity of life, the Earth and space, evolution, chemicals.     | <input type="checkbox"/> |
| 21.2. Science can explain the world's existence.                                                                        | <input type="checkbox"/> |
| 21.3. Learning about scientific issues is not important and has no relevance to my life.                                | <input type="checkbox"/> |
| 21.4. I often take part in science-related activities e.g. after school science clubs, reading about scientific issues. | <input type="checkbox"/> |
| 21.5. Learning about scientific issues is important for my future.                                                      | <input type="checkbox"/> |
| 21.6. I have a lot of interest in topics in physics.                                                                    | <input type="checkbox"/> |
| 21.7. I have a lot of interest in topics in chemistry.                                                                  | <input type="checkbox"/> |
| 21.8. I have a lot of interest in the biology of plants.                                                                | <input type="checkbox"/> |
| 21.9. I have a lot of interest in human biology.                                                                        | <input type="checkbox"/> |
| 21.10. I have a lot of interest in topics in astronomy.                                                                 | <input type="checkbox"/> |
| 21.11. I have a lot of interest in topics in geology.                                                                   | <input type="checkbox"/> |
| 21.12. I have a lot of interest in the ways scientists design experiments.                                              | <input type="checkbox"/> |
| 21.13. I have a lot of interest in what is required for scientific explanations.                                        | <input type="checkbox"/> |

**22. Please indicate how much you agree with the following statements about the value of science.**

|                                                                                                            | Strongly<br>Disagree     | Disagree                 | Slightly<br>Disagree     | Slightly<br>agree        | Agree                    | Strongly<br>Agree        |
|------------------------------------------------------------------------------------------------------------|--------------------------|--------------------------|--------------------------|--------------------------|--------------------------|--------------------------|
| 22.1. Making an effort in science is worth it because it will help me in the work that I will do later on. | <input type="checkbox"/> |
| 22.2. Learning science is worthwhile for me because it will improve my career prospects.                   | <input type="checkbox"/> |
| 22.3. Science is an important subject for me because I need it for what I want to study later on.          | <input type="checkbox"/> |

|                                                                                            | Strongly<br>Disagree     | Disagree                 | Slightly<br>Disagree     | Slightly<br>agree        | Agree                    | Strongly<br>Agree        |
|--------------------------------------------------------------------------------------------|--------------------------|--------------------------|--------------------------|--------------------------|--------------------------|--------------------------|
| 22.4. I will learn many things in science that will help me get a job.                     | <input type="checkbox"/> |
| 22.5. Some concepts in science help me see how I relate to other people.                   | <input type="checkbox"/> |
| 22.6. I will use science in many ways when I am an adult.                                  | <input type="checkbox"/> |
| 22.7. Science is very relevant to me.                                                      | <input type="checkbox"/> |
| 22.8. I find that science helps me to understand the things around me.                     | <input type="checkbox"/> |
| 22.9. When I leave school there will be many opportunities for me to use science.          | <input type="checkbox"/> |
| 22.10. Learning about science is important to help me understand the world I am living in. | <input type="checkbox"/> |
| 22.11. Advances in science and technology usually improve people's living conditions.      | <input type="checkbox"/> |
| 22.12. Science is important for helping us to understand the natural world.                | <input type="checkbox"/> |
| 22.13. Advances in science and technology usually help improve the economy.                | <input type="checkbox"/> |
| 22.14. Science is valuable to society.                                                     | <input type="checkbox"/> |
| 22.15. Advances in science and technology usually bring social benefits.                   | <input type="checkbox"/> |

**23. How easy do you think it would be for you to perform the following tasks on your own?**

|                                                                                                 | Strongly<br>Disagree     | Disagree                 | Slightly<br>Disagree     | Slightly<br>agree        | Agree                    | Strongly<br>Agree        |
|-------------------------------------------------------------------------------------------------|--------------------------|--------------------------|--------------------------|--------------------------|--------------------------|--------------------------|
| 23.1. I can recognise the science question that underlies a newspaper report on a health issue. | <input type="checkbox"/> |
| 23.2. I can explain why earthquakes occur more frequently in some areas than in others.         | <input type="checkbox"/> |
| 23.3. I can describe the role of antibiotics in the treatment of disease.                       | <input type="checkbox"/> |
| 23.4. I can identify the science issues associated with the disposal of garbage.                | <input type="checkbox"/> |
| 23.5. I can predict how changes to an environment will affect the survival of certain species.  | <input type="checkbox"/> |



|                                                                                                                       | Strongly<br>Disagree     | Disagree                 | Slightly<br>Disagree     | Slightly<br>agree        | Agree                    | Strongly<br>Agree        |
|-----------------------------------------------------------------------------------------------------------------------|--------------------------|--------------------------|--------------------------|--------------------------|--------------------------|--------------------------|
| 23.6. I can interpret the scientific information provided on the labelling of food items.                             | <input type="checkbox"/> |
| 23.7. I can discuss how new evidence can lead you to change your understanding about the possibility of life on Mars. | <input type="checkbox"/> |
| 23.8. I can identify the better of two explanations for the formation of acid rain.                                   | <input type="checkbox"/> |

**24. Please indicate how much you agree with the following statements about how well you do in science.**

|                                                                               | Strongly<br>Disagree     | Disagree                 | Slightly<br>Disagree     | Slightly<br>agree        | Agree                    | Strongly<br>Agree        |
|-------------------------------------------------------------------------------|--------------------------|--------------------------|--------------------------|--------------------------|--------------------------|--------------------------|
| 24.1. Learning advanced science topics would be easy for me.                  | <input type="checkbox"/> |
| 24.2. I can usually give good answers to questions in science tests.          | <input type="checkbox"/> |
| 24.3. I learn science topics quickly.                                         | <input type="checkbox"/> |
| 24.4. Science topics are easy for me.                                         | <input type="checkbox"/> |
| 24.5. When I am being taught science I can understand the concepts very well. | <input type="checkbox"/> |
| 24.6. I can easily understand new ideas in science.                           | <input type="checkbox"/> |

**25. Please indicate how much you agree with the following statements about how well science can explain parts of our world.**

|                                                                               | Strongly<br>Disagree     | Disagree                 | Slightly<br>Disagree     | Slightly<br>agree        | Agree                    | Strongly<br>Agree        |
|-------------------------------------------------------------------------------|--------------------------|--------------------------|--------------------------|--------------------------|--------------------------|--------------------------|
| 25.1. Biology doesn't explain everything about life.                          | <input type="checkbox"/> |
| 25.2. Everything people do is decided by their brains.                        | <input type="checkbox"/> |
| 25.3. The physical brain and human experience are two sides of the same coin. | <input type="checkbox"/> |
| 25.4. The human mind is really just a computer program.                       | <input type="checkbox"/> |

|                                                                                                   | Strongly<br>Disagree     | Disagree                 | Slightly<br>Disagree     | Slightly<br>agree        | Agree                    | Strongly<br>Agree        |
|---------------------------------------------------------------------------------------------------|--------------------------|--------------------------|--------------------------|--------------------------|--------------------------|--------------------------|
| 25.5. The intelligence of humans is like that of computers in some ways, but different in others. | <input type="checkbox"/> |
| 25.6. The more science advances the more it shows how mysterious the world is.                    | <input type="checkbox"/> |
| 25.7. Science can potentially explain everything.                                                 | <input type="checkbox"/> |

**26. Write a few lines to explain what you understand by the word 'science'.**

**27. Please indicate how much you agree with the following statements about scientific theories.**

|                                                                                                                                                                | Strongly<br>Disagree     | Disagree                 | Slightly<br>Disagree     | Slightly<br>agree        | Agree                    | Strongly<br>Agree        |
|----------------------------------------------------------------------------------------------------------------------------------------------------------------|--------------------------|--------------------------|--------------------------|--------------------------|--------------------------|--------------------------|
| 27.1. Science explains things in one way; religion explains them in another.                                                                                   | <input type="checkbox"/> |
| 27.2. It is science alone, not God, that explains the origin of the world.                                                                                     | <input type="checkbox"/> |
| 27.3. Religion and science both explain the origin of the world in different ways.                                                                             | <input type="checkbox"/> |
| 27.4. The laws of nature leave no room for God to act in the world.                                                                                            | <input type="checkbox"/> |
| 27.5. God doesn't influence the world in the same way as the laws of nature.                                                                                   | <input type="checkbox"/> |
| 27.6. Evolution leaves no room for God to influence how life develops.                                                                                         | <input type="checkbox"/> |
| 27.7. Evolution is God's way of bringing species into existence.                                                                                               | <input type="checkbox"/> |
| 27.8. It is possible to believe in a God and still hold the view that life on earth, including human life, evolved over time as a result of natural selection. | <input type="checkbox"/> |
| 27.9. People who accept evolution do not believe in God.                                                                                                       | <input type="checkbox"/> |
| 27.10. The Big Bang was not responsible for the start of the universe; it was created by God.                                                                  | <input type="checkbox"/> |

28. These questions ask about your ideas about scientific theories. Creationism is the belief that the universe and living organisms originate from specific acts of divine creation rather than by natural processes such as evolution.

|                                                                                                              | Strongly<br>Disagree     | Disagree                 | Slightly<br>Disagree     | Slightly<br>agree        | Agree                    | Strongly<br>Agree        |
|--------------------------------------------------------------------------------------------------------------|--------------------------|--------------------------|--------------------------|--------------------------|--------------------------|--------------------------|
| 28.1 Would you support creationism being taught alongside evolution in the science classroom?                | <input type="checkbox"/> |
| 28.2 Would you support creationism being taught alongside evolution in the RE classroom?                     | <input type="checkbox"/> |
| 28.3 Do you consider biological evolution as being in conflict with your personal religious beliefs?         | <input type="checkbox"/> |
| 28.4 Would you like science lessons to include religious views, for example about how the world was created? | <input type="checkbox"/> |

29. What do you think a theory is?

30. What do you think a law of nature is?

31. What do you think the term miracle means?

32. When you think about what religious texts say, do you find that they seem to contradict what you hear in science (contradict means something which does not support an idea)? Explain how/Why not.

33. Write a few lines to describe how you see the relationship between science and religion. Are they distinct or do they tackle overlapping questions? Are science and religion complementary or in conflict?

34. Add any comments here.
